Associations between natural sunlight exposure, brain structure, and cognition: a  
prospective study

Huihui Li, MA <sup>1</sup>; Fusheng Cui, MA <sup>2</sup>; Tong Wang, MD <sup>3</sup>; Weijing Wang, MD <sup>4</sup> \*;

Dongfeng Zhang, MD <sup>5</sup> \*

**Affiliations:**

Department of Epidemiology and Health Statistics, Public Health College, Qingdao  
University, Qingdao, Shandong Province, China;

**\* Corresponding author:**

1. Prof. Dongfeng Zhang (primary corresponding author)

Department of Epidemiology and Health Statistics, Public Health College, Qingdao  
University, No. 308 Ningxia Road, Qingdao, 266021, Shandong Province, China

Email address: zhangdf1961@126.com.

Tel: +8653282991712

Fax: +8653283801449

2. Dr. Weijing Wang

Department of Epidemiology and Health Statistics, Public Health College, Qingdao  
University, No. 308 Ningxia Road, Qingdao, 266021, Shandong Province, China

Email address: wangwj793@126.com.

Tel: +8653282991712

Fax: +8653283801449

**Manuscript word count:** 3052

## **Key Points**

**Question** Is natural sunlight exposure related to changes in brain structure and cognition?

**Findings** In this longitudinal study involving over 25,000 participants, negative associations between sunlight exposure and both brain structure and cognitive function were observed using generalized linear models. Additionally, brain structure was found to mediate the association between sunlight and cognition.

**Meaning** These findings suggest that regulating natural sunlight exposure time is important for both brain structure and cognitive function.

## **Abstract**

**Importance** Sunlight is closely intertwined with daily life. It remains unclear whether there are associations between sunlight exposure, brain structure, and cognition.

**Objective** Exploring the relationship between natural sunlight exposure time, brain structure, and cognition.

**Design, Setting, and Participants** This longitudinal study utilized baseline data (2006-2010) and follow-up data (2014+) from the UK Biobank. The statistical analysis was conducted in 2023. Participants were recruited in the United Kingdom and volunteered to take part and complete data collection at assessment centers.

**Exposure** The average daily exposure time to natural sunlight.

**Main Outcomes and Measures** Brain structure (white matter volume and gray matter volume), cognitive function tests. Generalized linear models were used to examine the associations between sunlight exposure time and brain structure and cognitive function tests. Stratification analyses were performed based on season, sex, age, and diseases (hypertension, stroke, coronary heart disease, diabetes). Mediation models were performed to explore the mediating role of brain structure in the association between sunlight exposure and cognition.

**Results** In the final sample of over 25,000 participants, the duration of natural sunlight exposure was negatively correlated with white and gray matter volumes. The strongest associations were observed in the white matter volume of the thalamus (left:  $\beta$ : -14.43, PFDR<0.001; right:  $\beta$ : -13.25, PFDR<0.001) and in the gray matter volume of the frontal pole (left:  $\beta$ : -7.91, PFDR<0.001; right:  $\beta$ : -6.65, PFDR<0.001),

respectively. Natural sunlight exposure time was also negatively related to cognition.

These associations were more pronounced in the summer, in males and individuals under the age of 60. Gray matter volume played a higher mediating role than white matter volume in the association of natural sunlight exposure duration with cognition, with the highest effects seen in gray matter-mediated trail making 1 (11.61%) and white matter volume-mediated symbol digit substitution (3.24%).

**Conclusions and Relevance** This longitudinal study demonstrates that prolonged exposure to natural sunlight is associated with brain atrophy and cognitive decline. Brain structure mediates the relationship between natural sunlight and cognition. These findings offer new insights into the mechanisms underlying the association between natural sunlight and cognition.

## Introduction

Sunlight is closely associated with human health. Sunlight plays a crucial role in maintaining overall health by participating in multiple processes such as skin synthesis of vitamin D<sup>1,2</sup> and regulating the circadian rhythm<sup>3,4</sup>. However, inappropriate exposure to ultraviolet (UV) radiation from sunlight can result in both acute and chronic health consequences, including skin cancer,<sup>5</sup> sunburn (erythema),<sup>6</sup> immunosuppression,<sup>7</sup> DNA damage,<sup>8</sup> and more. The UV radiation has the potential to suppress cell-mediated immune function, leading to inflammatory responses,<sup>7</sup> while the inflammatory responses are recognized as one of the risk factors for dementia.<sup>9</sup> Additionally, worsening air pollution has contributed to the thinning of the ozone layer, reducing its capacity to absorb UV radiation, which may result in increased UV exposure for individuals.<sup>10</sup> Besides, it has been shown that individuals with lighter skin tones are more susceptible to the effects of UV radiation.<sup>11</sup>

The brain can also be affected by sunlight. The brain volume is primarily composed of white matter and gray matter. White matter occupies more than half of the total human brain volume and is primarily composed of myelinated axons.<sup>12</sup> White matter plays a crucial role in coordinating information transmission and integration among different brain regions.<sup>13,14</sup> The central nervous system comprises another crucial component known as gray matter, which consists of neurons, glial cells, and microvasculature. These neurons are responsible for processing and transmitting information, while glial cells provide support and protection. The microvascular system supplies oxygen and nutrients to meet the needs of neurons. Brain function relies on the delivery of oxygen and nutrients through blood circulation

and also depends on the brain's ability to maintain thermal balance. When exposed to sunlight, more blood flows away from the brain to regulate brain temperature, resulting in a reduced blood flow to the brain, which may lead to brain damage.<sup>15,16</sup> Experimental studies have found that direct exposure of the head and neck to sunlight radiation can result in a core temperature increase of 1°C, and may impair motor-cognitive functions.<sup>17</sup>

While previous researches have explored the association between sunlight and cognitive function, most studies have primarily focused on the relationship between sunlight and global cognitive function or the occurrence of dementia.<sup>2,18-21</sup> There remains a gap in the investigation of the associations between natural sunlight exposure and various cognitive domains, as well as the direction of these associations. Moreover, there is limited research on the mechanisms underlying the association. Research indicates that changes in brain morphology, such as white matter integrity, may precede and potentially lead to declines in cognitive function,<sup>22</sup> and individual differences in cognitive function are partially explained by variations in brain structure<sup>23</sup>. Therefore, investigating the mediating role of the brain structure in the association between natural sunlight and cognitive function may contribute to the understanding of the mechanisms underlying the connection.

We used the data from the UK Biobank cohort to address these gaps. The aims of this study are (1) to explore the relationships between sunlight exposure and regional white matter volumes (WMVs) as well as gray matter volumes (GMVs); (2) to examine the association between sunlight exposure and cognition, and further

ascertain the direction of these associations; and (3) to investigate whether MMV and GMV mediate the associations between sunlight exposure and cognition. Furthermore, since the season, sex, and age differences in the association between sunlight exposure and cognition<sup>2</sup>, we further conducted stratified analyses based on these factors to investigate the sunlight-brain structure and sunlight-cognition associations separately. In addition, considering that hypertension,<sup>24,25</sup> stroke,<sup>26,27</sup> coronary heart disease,<sup>28,29</sup> and diabetes<sup>30,31</sup> are closely associated with brain structure as well as cognitive impairment, we also tried to analyze the relationships between sunlight exposure and brain structure and cognition in these diseases groups, respectively.

## **Methods**

### **Data Sources and Study Design**

The UK Biobank is a population-based, large-scale prospective cohort study that recruited over 500,000 participants nationwide from March 2006 to December 2010. After signing the written informed consent forms, all participants completed baseline assessments at one of the 22 assessment centers, which were located in England, Scotland, or Wales. These assessments included touchscreen questionnaires, verbal interviews, physical examinations, and the collection of biological samples. Starting in 2014, a subset of participants was invited to four assessment centers for cognitive function questionnaires, imaging scans, and more. The UK Biobank has obtained approval from the Northwest Multi-Center Research Ethics Committee (reference 06/MRE08/65). The specific selection process flowchart is presented in e Figure 1 in Supplement.

## **Exposure Measurements**

The time spend in summer and winter is collected through touchscreen questionnaires during participants' visits to the assessment center. Responses of "Don't know" and "Prefer not to answer" are excluded, and "Less than 1 hour" was redefined as 0 hour. Participants who reported the time exceeding 16 hours in summer and 8 hours in winter were removed based on the effective daylight hours in the UK. The exposure variable was the annual average sunlight exposure time, which was calculated by taking the average outdoor time during both the summer and winter.

## **Mediator Measurements**

White matter volume and gray matter volume were the mediator variables. T1-weighted data was acquired on a 3T Siemens Skyra scanner using a standard 32-channel head coil. The parameters for the magnetization-prepared rapid gradient-echo imaging sequence were set as follows: resolution: 1×1×1 mm, field-of-view (FOV): 208×256×256 matrix, duration: 5 min. Subcortical structures were segmented using FIRST (version 5.0), an integrated registration and segmentation tool within FMRIB. Cortical tissue-type segmentation was completed using FAST, FMRIB's automated segmentation tool. The UK Biobank team processed and quality-controlled the estimates of white matter volume, providing them as image-derived phenotypes to approved researchers. A comprehensive summary of the data acquisition protocols and preprocessing procedures is available at [https://biobank.ctsu.ox.ac.uk/crystal/crystal/docs/brain\\_mri.pdf](https://biobank.ctsu.ox.ac.uk/crystal/crystal/docs/brain_mri.pdf).

## **Outcomes Measurements**



During baseline assessments, a brief cognitive evaluation is conducted using a battery of assessments, which include: prospective memory test, pairs matching test, numeric memory test, fluid intelligence test, and reaction time test. In subsequent imaging studies, a subset of participants completed more detailed cognitive function measurements, including baseline assessments and additional tests: trail making test (2 measures), symbol digit substitution test, picture vocabulary test, paired associate learning test, matrix pattern completion test, tower rearranging test. More detailed information about cognitive function tests can be found in e Table 1 in Supplement and elsewhere.<sup>32</sup>

### **Covariates**

Based on prior studies on sunlight and cognitive function, the following factors were identified as potential confounding variables: age, sex, assessment centers, Townsend Deprivation Index (TDI), years of education,<sup>33</sup> employment status, physical activity, body mass index (BMI), smoking status, alcohol drinker status, skin color, use of sun/UV protection, history of fractures in the past 5 years, air pollution (PM2.5),<sup>2</sup> vitamin D supplementation, sleep duration, brain volume, history of hypertension, history of stroke, history of coronary heart disease, and history of diabetes. The detailed definitions of hypertension, stroke, coronary heart disease, and diabetes and the classification of categorical covariates can be found in e Table 2 and e Table 5 in Supplement.

### **Statistical analyses**

Generalized linear models were employed to analyze the relationship between sunlight exposure and cognition. For count-based cognitive function tests, such as pair matching test, a generalized linear model with a poisson link function was used. Significantly positively skewed cognitive function tests (e.g., traction time test) were log-transformed, and then generalized linear model with identity link function were used to analyze correlations. Generalized linear model with a logit link function was used to analyze binary classification cognitive function tests, such as prospective memory test. As for the relationships between sunlight exposure and regional white and gray matter volumes, generalized linear model with identity link function was applied. Moreover, to control the false discovery rate (FDR) and adjust for multiple comparisons, a Benjamini and Hochberg approach was applied.<sup>34</sup> This was accomplished using the '*p.adjust*' function in R 4.2.3, with FDR-corrected *p*-values (PFDR) less than 0.05 indicating statistical significance.

Among the 12 cognitive function tests, 5 have baseline data. We conducted a classical two-wave cross-lagged panel model analysis to examine the longitudinal associations between sunlight exposure time and these 5 tests. In the mediation analysis, the average values of regional white matter and gray matter volumes associated with sunlight exposure were separately calculated as the mediator variables. Sunlight exposure time was the exposure variable, and the cognitive function tests were treated as separate outcome variables, adjusted for covariates. If the two-wave cross-lagged panel model analysis revealed longitudinal associations between baseline tests and subsequent sunlight exposure time, we exchanged the position of sunlight

exposure time and cognitive function tests. Mediation analysis was performed using the “*mediation*” package in R version 4.2.3, with 5000 bootstrapping iterations.

In the stratified analysis, the subjects were divided into subgroups based on age (< 60, >= 60), sex, season, and disease history (hypertension, stroke, coronary heart disease, and diabetes). Within each subgroup, we analyzed the relationships between sunlight exposure time and brain structure as well as cognition. In sensitivity analyses, we separately excluded participants who developed dementia in the first 5 years of follow-up and 10 years of follow-up, to control for potential reverse causality.

The statistical analyses were performed using the “*lavaan*” package and “*mediation*” package conducted in R version 4.2.3, and statistical significance was set at the  $p$ -value < 0.05 for two-tailed tests.

## **Results**

A total of 57441 participants who completed at least one cognitive function test were included in baseline characterization analysis. (e Table 3 in Supplement)

### **Main analysis**

The association between sunlight exposure duration and brain structure was presented in Table 1 and Table 2. As shown in Table 1, natural sunlight exposure time was almost negatively associated with regional WMVs (PFDR < 0.001), except for the volume of right amygdala (PFDR = 0.093) in the Model 1. After further adjustment for other confounding factors, the associations still statistically significant (PFDR < 0.05). As shown in Table 2, sunlight exposure time was also negatively associated

with GMVs in 122 regions, especially the frontal and temporal poles, as well as the amygdala (PFDR<0.001).

Sunlight exposure time was significantly associated with cognitive function tests in all three models. (Table 3) In terms of cognitive function, as the duration of sunlight exposure increased, performance in prospective memory, visual declarative memory, working memory, verbal and numerical reasoning, processing speed, executive function, vocabulary, and non-verbal reasoning declined.

### **Mediation analysis**

Table 4 and 5 summarized the mediating effects of brain structure in the association between sunlight exposure and cognitive function tests. The top three cognitive function tests with the highest mediating effects for mean WMV were symbol digit substitution (3.24%), trail making 1 (2.77%), pairs matching (2.69%). The top three mediating effects of mean GMV were trail making 1 (11.61%), fluid intelligence / reasoning (10.96%), and trail making 2 (6.67%).

e Figure 2 in Supplement presented the results of the longitudinal association analysis of the five cognitive function tests with baseline data. The results suggested potential bidirectional associations between sunlight exposure time and cognition. When swapping the positions of sunlight exposure time and three cognitive tests based on the longitudinal analysis results, mean WMV and mean GMV only partially mediated the relationships between sunlight exposure time and prospective memory test (3.19% vs. 4.77%) as well as fluid intelligence/reason test (2.38% vs. 3.12%). (e

Figure 3 in Supplement)

### **Stratified analysis**

When stratified by season, a greater number of brain regions were influenced by summer sunlight exposure time than in winter. In the summer, sunlight exposure time was significantly associated with the reduction in volumes of 11 white matter regions (excluding the right amygdala) and 102 gray matter regions. In contrast, sunlight exposure time in winter was only significantly related to the reduction in volumes of 10 white matter regions (excluding the bilateral caudate, the left pallidum, and the right amygdala) and 42 gray matter regions. (e Table 4 and e Table 5 in Supplement)

Winter sunlight exposure time was correlated with 12 cognitive tests, while summer sunlight exposure time was correlated with 10 cognitive tests. (e Table 6 in Supplement)

Among females, the relationships with brain structure were slightly higher in males (WMV: 7, GMV: 101) than in females (WMV: 4, GMV: 91). We didn't find the relationships between sunlight exposure time and reaction time test in female, and paired matching test in males. (e Table 4 - e Table 6 in Supplement) Compared to the group aged 60 and above, the group under 60 years old showed a broader range of correlations between sunlight exposure and brain structures as well as cognitive function tests. (e Table 4 - 6 in Supplement) With longer sunlight exposure time, participants under 60 exhibited shrinkage in WMVs of 11 regions and GMVs of 103 regions as well as worsened performance in all cognitive domains. In the group of hypertension, sunlight exposure time was only associated with bilateral thalamus

white matter volumes and 29 GMVs. Regarding cognition, sunlight exposure was related to cognitive tests, except pairs matching test and reaction time test. The groups with a history of stroke, coronary heart disease, and diabetes were correlated with a few cognitive function tests, but no relationship was found with brain structure. (e Table 7 - e Table 9 in Supplement)

### **Sensitivity analysis**

After excluding participants who developed dementia within the first 5 years and the first 10 years of follow-up, the results still consistent with the main results. The detailed results of the sensitivity analysis can be found in the Supplement. (e Table 10 - e Table 15 in Supplement)

### **Discussion**

We observed negative relationships between natural sunlight exposure and regional white matter as well as gray matter volumes. Regarding cognition, exposure to sunlight was closely associated with worse cognitive performance. Besides, the above associations exhibited variations based on season, sex, and age. In the longitudinal analysis, we were surprised to find that sunlight exposure might exhibit bidirectional associations with certain cognitive function tests, like prospective memory test. Additionally, both mean WMV and mean GMV played a partially mediating role in the association between sunlight exposure and cognitive function. In other words, natural sunlight appears to partially influence cognitive function by inducing changes in brain structure.

The finding regarding the association of natural sunlight exposure with cognition align with previous comparative studies conducted on worker populations. Exposure to sunlight has been observed to decrease attention allocation and vigilance. Under both temperate and tropical climate conditions, sunlight exposure has been shown to result in cognitive impairment.<sup>35</sup> Our results partially align with a prospective study conducted on a dementia population. Ma, L.-Z., et al. found a “J-shaped” relationship between sunlight exposure and dementia occurrence, whereas we didn’t observe the protective effect of low-dose sunlight exposure on cognition.<sup>2</sup> This difference might be attributed to difference in outcome measures and sample size. Dementia is a slowly progressive condition, and the cognition changes we focused on occur earlier than the diagnosis of dementia.<sup>36-39</sup> Additionally, our study had a larger sample size.

Exposure to sunlight is widely associated with regional WMVs and GMVs, which play a partially mediating role in the association between sunlight exposure and cognition. However, it is possible that other environmental or genetic factors play a greater mediating role between sunlight exposure and cognition, resulting brain structure had a small mediating effect in this study. Further research is needed to identify other mediating variables.

The mechanisms of sunlight-induced damage to brain structure and cognition are not fully understood and maybe the following two mechanisms: (1) Sunlight exposure causes an increase in core temperature, and then more blood flowing away from the brain, resulting in reduced cerebral blood flow, which in turn can cause damage to both brain structures and cognition.<sup>15-17</sup> (2) The UV radiation in natural sunlight can

damage immune cells in the body, triggering inflammatory responses that can lead to damage.<sup>7,9</sup> Besides, research indicates that the atrophy of white matter may lead to cognitive impairment such as vascular dementia and other related conditions.<sup>12,40-42</sup> Additionally, the atrophy of gray matter volume is also associated with the decline in cognition, such as in Alzheimer's disease.<sup>41,43</sup>

The relationship between natural sunlight exposure and cognitive decline, as well as change in brain structure, appear to be more extensive in the summer season, in individuals younger than 60 years old, and males. This can be attributed to higher temperature and stronger UV radiation during the summer in the United Kingdom.<sup>44</sup> Additionally, during the summer, people tend to expose more skin due to warmer weather and clothing choices, leading to increased UV exposure. Younger individuals tend to engage in outdoor activities, and research has found that among people above 20 years, the frequency of sunburn decreases with age.<sup>45,46</sup> There are known structural and biological differences in the skin between sex.<sup>47,48</sup> Compared to females, males tend to be more sensitive to UV radiation and may experience immune-suppression reactions more frequently.<sup>49,50</sup> Conversely, the presence of estrogen in the female body may exert inhibitory effects on immune-suppression reactions.<sup>51</sup> Furthermore, males are generally less likely to use sun protection measures, resulting in greater sunlight exposure.<sup>46</sup>

This study represents the first exploration of the associations between natural sunlight exposure and brain structure as well as cognition in the general population. Furthermore, we conducted multi-level analyses stratified by season, age, sex, and



four diseases (hypertension, stroke, coronary heart disease, and diabetes) to investigate variations among different subgroups. However, there are still some limitations. First, sunlight exposure time relied on self-reports from participants, which may introduce recall bias and subjective assessment. Second, while we have initially explored the associations between sunlight exposure and cognition in some cognitive tests, the observational nature of this study prevents us from establishing causality. Third, the associations between sunlight exposure and brain structure were not observed in groups with specific diseases due to the relatively small number of participants with those conditions. Fourth, the participants in this study were primarily white individuals from high-latitude regions, which may limit the generalizability of the findings to other regions and ethnicities. Fifth, despite controlling for numerous confounding factors, there are unaccounted genetic and environmental factors that could influence the results.

## **Conclusions**

In conclusion, our study has revealed an association between natural sunlight exposure and both brain structure and cognitive function. This provides new insights into the mechanisms underlying the impact of sunlight exposure on cognition. Future research can delve deeper into the mechanisms underlying these connections and consider additional potential influencing factors to attain a more comprehensive understanding of cognition and brain structure.

## **Acknowledgements**

**Author Contributions:** Prof. Dongfeng Zhang had full access to all of the data in the study and takes responsibility for the integrity of the data and the accuracy of the data analysis.

**Concept and design:** Huihui Li, Fusheng Cui.

**Acquisition, analysis, or interpretation of data:** All authors.

**Drafting of the manuscript:** Huihui Li, Fusheng Cui.

**Critical revision of the manuscript for important intellectual content:** Dongfeng Zhang, Weijing Wang.

**Statistical analysis:** Fusheng Cui, Tong Wang, Weijing Wang.

**Obtained funding:** Dongfeng Zhang, Weijing Wang.

**Administrative, technical, or material support:** Dongfeng Zhang, Weijing Wang, Tong Wang.

**Supervision:** Dongfeng Zhang, Weijing Wang, Tong Wang.

**Acknowledgements:** This study utilized data from the UK Biobank and was approved by the UK Biobank (proposal 95715). The authors gratefully thank all the participants and professionals contributing to the UK Biobank.

**Conflict of Interest Disclosures:** None reported.

**Funding/Support:** This study was supported by the National Natural Science Foundation of China (82073641).

**Role of the Funder/Sponsor:** The funding organizations had no role in the design and conduct of the study; collection, management, analysis, and interpretation of the data; preparation, review, or approval of the manuscript; and decision to submit the manuscript for publication.

## References

1. Afzal S, Bojesen SE, Nordestgaard BG. Reduced 25-hydroxyvitamin D and risk of Alzheimer's disease and vascular dementia. *Alzheimers Dement*. 2014;10(3):296-302. doi:10.1016/j.jalz.2013.05.1765
2. Ma L-Z, Ma Y-H, Ou Y-N, et al. Time spent in outdoor light is associated with the risk of dementia: a prospective cohort study of 362094 participants. *BMC Med*. 2022;20(1):132. doi:10.1186/s12916-022-02331-2
3. Chen S-J, Deng Y-T, Li Y-Z, et al. Association of circadian rhythms with brain disorder incidents: a prospective cohort study of 72242 participants. *Transl Psychiatry*. 2022;12(1):514. doi:10.1038/s41398-022-02278-1
4. Hjetland GJ, Pallesen S, Thun E, Kolberg E, Nordhus IH, Flo E. Light interventions and sleep, circadian, behavioral, and psychological disturbances in dementia: A systematic review of methods and outcomes. *Sleep Med Rev*. 2020;52:101310. doi:10.1016/j.smrv.2020.101310
5. Osterlind A. Cancer and UV-radiation. *Pharmacol Toxicol*. 1993;72 Suppl 1:67-68.
6. Camponogara C, Oliveira SM. Are TRPA1 and TRPV1 channel-mediated signalling cascades involved in UVB radiation-induced sunburn? *Environ Toxicol Pharmacol*. 2022;92:103836. doi:10.1016/j.etap.2022.103836

- 7.** Murphy GM. Ultraviolet radiation and immunosuppression. *Br J Dermatol.* 2009;161 Suppl 3:90-95. doi:10.1111/j.1365-2133.2009.09455.x
- 8.** Mullenders LHF. Solar UV damage to cellular DNA: from mechanisms to biological effects. *Photochem Photobiol Sci.* 2018;17(12):1842-1852. doi:10.1039/c8pp00182k
- 9.** Morrens M, Overloop C, Coppens V, et al. The relationship between immune and cognitive dysfunction in mood and psychotic disorder: a systematic review and a meta-analysis. *Mol Psychiatry.* 2022;27(8):3237-3246. doi:10.1038/s41380-022-01582-y
- 10.** Umar SA, Tasduq SA. Ozone Layer Depletion and Emerging Public Health Concerns - An Update on Epidemiological Perspective of the Ambivalent Effects of Ultraviolet Radiation Exposure. *Front Oncol.* 2022;12:866733. doi:10.3389/fonc.2022.866733
- 11.** Kammeyer A, Luiten RM. Oxidation events and skin aging. *Ageing Res Rev.* 2015;21:16-29. doi:10.1016/j.arr.2015.01.001
- 12.** Filley CM, Fields RD. White matter and cognition: making the connection. *J Neurophysiol.* 2016;116(5):2093-2104. doi:10.1152/jn.00221.2016
- 13.** Mesulam MM. Large-scale neurocognitive networks and distributed processing for attention, language, and memory. *Ann Neurol.* 1990;28(5):597-613.
- 14.** Catani M, Dell'acqua F, Bizzi A, et al. Beyond cortical localization in clinico-anatomical correlation. *Cortex.* 2012;48(10):1262-1287. doi:10.1016/j.cortex.2012.07.001

15. Nybo L, Secher NH, Nielsen B. Inadequate heat release from the human brain during prolonged exercise with hyperthermia. *J Physiol*. 2002;545(2):697-704.
16. Bain AR, Nybo L, Ainslie PN. Cerebral Vascular Control and Metabolism in Heat Stress. *Compr Physiol*. 2015;5(3):1345-1380. doi:10.1002/cphy.c140066
17. Piil JF, Christiansen L, Morris NB, et al. Direct exposure of the head to solar heat radiation impairs motor-cognitive performance. *Sci Rep*. 2020;10(1):7812. doi:10.1038/s41598-020-64768-w
18. Gao Q, Luan D, Wang X, Xin S, Liu Y, Li J. Effect of sun exposure on cognitive function among elderly individuals in Northeast China. *Clin Interv Aging*. 2018;13:2075-2082. doi:10.2147/CIA.S179355
19. Kent ST, McClure LA, Crosson WL, Arnett DK, Wadley VG, Sathiakumar N. Effect of sunlight exposure on cognitive function among depressed and non-depressed participants: a REGARDS cross-sectional study. *Environ Health*. 2009;8:34. doi:10.1186/1476-069X-8-34
20. Xin S, Luan D, Wang X, Wang F, Liu Y, Gao Q. Relationship between cumulative ultraviolet exposure and cognitive function in a rural elderly Chinese population. *Int J Geriatr Psychiatry*. 2018;33(8):1121-1126. doi:10.1002/gps.4902
21. Knippenberg S, Damoiseaux J, Bol Y, et al. Higher levels of reported sun exposure, and not vitamin D status, are associated with less depressive symptoms and fatigue in multiple sclerosis. *Acta Neurol Scand*. 2014;129(2):123-131. doi:10.1111/ane.12155

- 22.** Marsland AL, Gianaros PJ, Kuan DCH, Sheu LK, Krajina K, Manuck SB. Brain morphology links systemic inflammation to cognitive function in midlife adults. *Brain Behav Immun.* 2015;48:195-204. doi:10.1016/j.bbi.2015.03.015
- 23.** Patel R, Mackay CE, Jansen MG, et al. Inter- and intra-individual variation in brain structural-cognition relationships in aging. *Neuroimage.* 2022;257:119254. doi:10.1016/j.neuroimage.2022.119254
- 24.** Zhou TL, Kroon AA, van Sloten TT, et al. Greater Blood Pressure Variability Is Associated With Lower Cognitive Performance. *Hypertension.* 2019;73(4):803-811. doi:10.1161/HYPERTENSIONAHA.118.12305
- 25.** Shang X, Hill E, Zhu Z, et al. The Association of Age at Diagnosis of Hypertension With Brain Structure and Incident Dementia in the UK Biobank. *Hypertension.* 2021;78(5):1463-1474. doi:10.1161/HYPERTENSIONAHA.121.17608
- 26.** Kokmen E, Whisnant JP, O'Fallon WM, Chu CP, Beard CM. Dementia after ischemic stroke: a population-based study in Rochester, Minnesota (1960-1984). *Neurology.* 1996;46(1):154-159.
- 27.** Marin MA, Carmichael ST. Mechanisms of demyelination and remyelination in the young and aged brain following white matter stroke. *Neurobiol Dis.* 2019;126doi:10.1016/j.nbd.2018.07.023
- 28.** Nuraeni A, Anna A, Praptiwi A, Nurhamsyah D. Illness cognition and depression among patients with coronary heart disease. *Belitung Nurs J.* 2021;7(4):304-310. doi:10.33546/bnj.1540

- 29.** Kovacic JC, Castellano JM, Fuster V. The links between complex coronary disease, cerebrovascular disease, and degenerative brain disease. *Ann N Y Acad Sci.* 2012;1254doi:10.1111/j.1749-6632.2012.06482.x
- 30.** Kodl CT, Seaquist ER. Cognitive dysfunction and diabetes mellitus. *Endocr Rev.* 2008;29(4):494-511. doi:10.1210/er.2007-0034
- 31.** Moheet A, Mangia S, Seaquist ER. Impact of diabetes on cognitive function and brain structure. *Ann N Y Acad Sci.* 2015;1353:60-71. doi:10.1111/nyas.12807
- 32.** Fawns-Ritchie C, Deary IJ. Reliability and validity of the UK Biobank cognitive tests. *PLoS One.* 2020;15(4):e0231627. doi:10.1371/journal.pone.0231627
- 33.** Cullen B, Newby D, Lee D, et al. Cross-sectional and longitudinal analyses of outdoor air pollution exposure and cognitive function in UK Biobank. *Sci Rep.* 2018;8(1):12089. doi:10.1038/s41598-018-30568-6
- 34.** Benjamini Y, Hochberg Y. Controlling the false discovery rate: a practical and powerful approach to multiple testing. Article. *Journal of the royal statistical society series b-statistical methodology.* 1995 1995;57(1):289-300. doi:10.1111/j.2517-6161.1995.tb02031.x
- 35.** Ioannou LG, Tsoutsoubi L, Mantzios K, et al. The Impacts of Sun Exposure on Worker Physiology and Cognition: Multi-Country Evidence and Interventions. *Int J Environ Res Public Health.* 2021;18(14)doi:10.3390/ijerph18147698
- 36.** Dubois B, Hampel H, Feldman HH, et al. Preclinical Alzheimer's disease: Definition, natural history, and diagnostic criteria. *Alzheimers Dement.* 2016;12(3):292-323. doi:10.1016/j.jalz.2016.02.002



- 37.** Albert MS, DeKosky ST, Dickson D, et al. The diagnosis of mild cognitive impairment due to Alzheimer's disease: recommendations from the National Institute on Aging-Alzheimer's Association workgroups on diagnostic guidelines for Alzheimer's disease. *Alzheimers Dement.* 2011;7(3):270-279. doi:10.1016/j.jalz.2011.03.008
- 38.** Jack CR, Knopman DS, Jagust WJ, et al. Tracking pathophysiological processes in Alzheimer's disease: an updated hypothetical model of dynamic biomarkers. *Lancet Neurol.* 2013;12(2):207-216. doi:10.1016/S1474-4422(12)70291-0
- 39.** Sperling RA, Aisen PS, Beckett LA, et al. Toward defining the preclinical stages of Alzheimer's disease: recommendations from the National Institute on Aging-Alzheimer's Association workgroups on diagnostic guidelines for Alzheimer's disease. *Alzheimers Dement.* 2011;7(3):280-292. doi:10.1016/j.jalz.2011.03.003
- 40.** Nave K-A, Werner HB. Myelination of the nervous system: mechanisms and functions. *Annu Rev Cell Dev Biol.* 2014;30:503-533. doi:10.1146/annurev-cellbio-100913-013101
- 41.** Navale SS, Mulugeta A, Zhou A, Llewellyn DJ, Hyppönen E. Vitamin D and brain health: an observational and Mendelian randomization study. *Am J Clin Nutr.* 2022;116(2):531-540. doi:10.1093/ajcn/nqac107
- 42.** Fields RD. White matter in learning, cognition and psychiatric disorders. *Trends Neurosci.* 2008;31(7):361-370. doi:10.1016/j.tins.2008.04.001
- 43.** Dicks E, Vermunt L, van der Flier WM, et al. Modeling grey matter atrophy as a function of time, aging or cognitive decline show different anatomical patterns in

Alzheimer's disease. *Neuroimage Clin.* 2019;22:101786.

doi:10.1016/j.nicl.2019.101786

**44.** Seckmeyer G, Pissulla D, Glandorf M, et al. Variability of UV irradiance in Europe. *Photochem Photobiol.* 2008;84(1):172-179.

doi:10.1111/j.1751-1097.2007.00216.x

**45.** Thieden E, Philipsen PA, Sandby-Møller J, Wulf HC. Sunburn related to UV radiation exposure, age, sex, occupation, and sun bed use based on time-stamped personal dosimetry and sun behavior diaries. *Arch Dermatol.* 2005;141(4):482-488.

**46.** Holman DM, Ding H, Guy GP, Watson M, Hartman AM, Perna FM. Prevalence of Sun Protection Use and Sunburn and Association of Demographic and Behavioral Characteristics With Sunburn Among US Adults. *JAMA Dermatol.*

2018;154(5):561-568. doi:10.1001/jamadermatol.2018.0028

**47.** Giacomoni PU, Mammone T, Teri M. Gender-linked differences in human skin. *J Dermatol Sci.* 2009;55(3):144-149. doi:10.1016/j.jdermsci.2009.06.001

**48.** Oblong JE. Comparison of the impact of environmental stress on male and female skin. *Br J Dermatol.* 2012;166 Suppl 2:41-44. doi:10.1111/j.1365-2133.2012.10928.x

**49.** Broekmans WMR, Vink AA, Boelsma E, et al. Determinants of skin sensitivity to solar irradiation. *Eur J Clin Nutr.* 2003;57(10):1222-1229.

**50.** Liu-Smith F, Farhat AM, Arce A, et al. Sex differences in the association of cutaneous melanoma incidence rates and geographic ultraviolet light exposure.

*Journal of the American Academy of Dermatology.*

2017;76(3)doi:10.1016/j.jaad.2016.08.027

**51.** Hiramoto K, Tanaka H, Yanagihara N, Sato EF, Inoue M. Effect of 17beta-estradiol on immunosuppression induced by ultraviolet B irradiation. *Arch Dermatol Res.* 2004;295(8-9):307-311.

## **Abbreviations**

UV: ultraviolet

TDI: Townsend Deprivation Index

BMI: body mass index

WMV: white matter volume

GMV: gray matter volume

FDR: False discovery rate

**Table**

**Table 1. Association between sunlight exposure time and white matter volumes**

|               | Model1  |                        | Model2  |                        | Model3  |                        |
|---------------|---------|------------------------|---------|------------------------|---------|------------------------|
|               | $\beta$ | PFDR                   | $\beta$ | PFDR                   | $\beta$ | PFDR                   |
| Thalamus-l    | -17.113 | $3.47 \times 10^{-11}$ | -14.620 | $5.36 \times 10^{-08}$ | -14.430 | $7.76 \times 10^{-08}$ |
| Thalamus-r    | -16.114 | $3.72 \times 10^{-11}$ | -13.420 | $1.11 \times 10^{-07}$ | -13.250 | $1.56 \times 10^{-07}$ |
| Caudate-l     | -5.844  | $1.48 \times 10^{-04}$ | -4.227  | $7.58 \times 10^{-03}$ | -4.191  | $8.10 \times 10^{-03}$ |
| Caudate-r     | -5.629  | $3.15 \times 10^{-04}$ | -3.534  | $3.40 \times 10^{-02}$ | -3.504  | $3.55 \times 10^{-02}$ |
| Putamen-l     | -7.639  | $1.63 \times 10^{-04}$ | -6.382  | $2.49 \times 10^{-03}$ | -6.270  | $2.99 \times 10^{-03}$ |
| Putamen-r     | -8.305  | $3.98 \times 10^{-05}$ | -6.450  | $2.07 \times 10^{-03}$ | -6.347  | $2.45 \times 10^{-03}$ |
| Pallidum-l    | -3.356  | $1.63 \times 10^{-04}$ | -2.708  | $3.72 \times 10^{-03}$ | -2.663  | $4.34 \times 10^{-03}$ |
| Pallidum-r    | -3.246  | $1.99 \times 10^{-04}$ | -2.997  | $1.69 \times 10^{-03}$ | -2.951  | $2.00 \times 10^{-03}$ |
| Hippocampus-l | -8.623  | $1.10 \times 10^{-06}$ | -6.499  | $6.41 \times 10^{-04}$ | -6.398  | $7.95 \times 10^{-04}$ |
| Hippocampus-r | -8.852  | $1.10 \times 10^{-06}$ | -6.174  | $1.51 \times 10^{-03}$ | -6.077  | $1.82 \times 10^{-03}$ |
| Amygdala-l    | -3.335  | $2.00 \times 10^{-04}$ | -2.863  | $3.26 \times 10^{-03}$ | -2.822  | $3.74 \times 10^{-03}$ |
| Amygdala-r    | -1.642  | $9.30 \times 10^{-02}$ | -1.539  | $1.40 \times 10^{-01}$ | -1.527  | $1.43 \times 10^{-01}$ |
| Accumbens-l   | -1.475  | $3.61 \times 10^{-04}$ | -1.613  | $4.97 \times 10^{-04}$ | -1.601  | $5.50 \times 10^{-04}$ |
| Accumbens-r   | -1.453  | $1.76 \times 10^{-04}$ | -1.511  | $4.13 \times 10^{-04}$ | -1.508  | $4.17 \times 10^{-04}$ |

-l: left

-r: right

PFDR: P-value after FDR correction

Model 1: adjusted age, sex;

Model 2: adjusted age, sex, sleep duration, skin colour, use of sun/UV protection, fracture history, smoking status, alcohol drinker status, BMI, physical activity, PM2.5, TDI, years of education, employment status, vitamin D supplement, assessment center;

Model 3: adjusted age, sex, sleep duration, skin colour, use of sun/UV protection, fracture history, smoking status, alcohol drinker status, BMI, physical activity, PM2.5, TDI, years of education, employment status, vitamin D supplement, assessment center, history of hypertension, stroke, coronary heart disease and diabetes.

**Table2. Association between sunlight exposure time and gray matter volumes**

|                                       | Model1  |                         | Model2  |                        | Model3  |                        |
|---------------------------------------|---------|-------------------------|---------|------------------------|---------|------------------------|
|                                       | $\beta$ | FDR                     | $\beta$ | FDR                    | $\beta$ | FDR                    |
| Amygdala-l                            | -67.607 | $<3.97 \times 10^{-15}$ | -61.110 | $4.53 \times 10^{-13}$ | -61.250 | $3.66 \times 10^{-13}$ |
| Amygdala-r                            | -74.338 | $<3.97 \times 10^{-15}$ | -58.030 | $7.09 \times 10^{-10}$ | -58.320 | $5.37 \times 10^{-10}$ |
| Angular Gyrus-l                       | -12.262 | $1.66 \times 10^{-09}$  | -8.909  | $4.28 \times 10^{-05}$ | -8.977  | $3.60 \times 10^{-05}$ |
| Angular Gyrus-r                       | -13.183 | $6.32 \times 10^{-11}$  | -9.467  | $1.02 \times 10^{-05}$ | -9.486  | $9.61 \times 10^{-06}$ |
| Brain-Stem                            | -27.384 | $7.54 \times 10^{-07}$  | -22.350 | $1.45 \times 10^{-04}$ | -22.400 | $1.40 \times 10^{-04}$ |
| Caudate-l                             | -26.284 | $1.72 \times 10^{-07}$  | -22.060 | $4.41 \times 10^{-05}$ | -22.070 | $4.34 \times 10^{-05}$ |
| Caudate-r                             | -30.672 | $3.74 \times 10^{-08}$  | -23.060 | $9.87 \times 10^{-05}$ | -23.120 | $9.42 \times 10^{-05}$ |
| Central Opercular Cortex-l            | -24.605 | $3.45 \times 10^{-06}$  | -19.120 | $6.59 \times 10^{-04}$ | -19.060 | $6.78 \times 10^{-04}$ |
| Central Opercular Cortex-r            | -8.338  | $5.39 \times 10^{-06}$  | -7.459  | $1.45 \times 10^{-04}$ | -7.476  | $1.46 \times 10^{-04}$ |
| Cingulate Gyrus, anterior division-l  | -8.332  | $1.71 \times 10^{-07}$  | -7.079  | $3.99 \times 10^{-05}$ | -7.129  | $3.46 \times 10^{-05}$ |
| Cingulate Gyrus, anterior division-r  | -7.736  | $4.19 \times 10^{-06}$  | -6.749  | $1.45 \times 10^{-04}$ | -6.734  | $1.50 \times 10^{-04}$ |
| Cingulate Gyrus, posterior division-l | -7.700  | $4.19 \times 10^{-06}$  | -7.320  | $4.78 \times 10^{-05}$ | -7.346  | $4.42 \times 10^{-05}$ |
| Cingulate Gyrus, posterior division-r | -46.047 | $<3.97 \times 10^{-15}$ | -36.920 | $2.00 \times 10^{-10}$ | -36.960 | $1.83 \times 10^{-10}$ |
| Crus I Cerebellum-l                   | -36.699 | $4.53 \times 10^{-12}$  | -30.520 | $4.28 \times 10^{-08}$ | -30.570 | $3.94 \times 10^{-08}$ |
| Crus I Cerebellum-r                   | -32.435 | $<3.97 \times 10^{-15}$ | -28.210 | $2.75 \times 10^{-12}$ | -28.200 | $2.74 \times 10^{-12}$ |
| Crus I Cerebellum-v                   | -31.853 | $<3.97 \times 10^{-15}$ | -25.380 | $2.20 \times 10^{-10}$ | -25.410 | $2.02 \times 10^{-10}$ |
| Crus II Cerebellum-l                  | -6.255  | $2.68 \times 10^{-11}$  | -4.429  | $1.02 \times 10^{-05}$ | -4.442  | $9.56 \times 10^{-06}$ |
| Crus II Cerebellum-r                  | -5.383  | $1.80 \times 10^{-08}$  | -3.838  | $1.48 \times 10^{-04}$ | -3.848  | $1.50 \times 10^{-04}$ |
| Crus II Cerebellum-v                  | -8.332  | $4.64 \times 10^{-08}$  | -7.412  | $5.96 \times 10^{-06}$ | -7.414  | $5.92 \times 10^{-06}$ |
| Cuneal Cortex-l                       | -9.077  | $6.24 \times 10^{-08}$  | -7.089  | $7.84 \times 10^{-05}$ | -7.139  | $6.77 \times 10^{-05}$ |
| Cuneal Cortex-r                       | -8.155  | $1.93 \times 10^{-11}$  | -6.109  | $2.42 \times 10^{-06}$ | -6.116  | $2.18 \times 10^{-06}$ |
| Frontal Medial Cortex-l               | -6.123  | $7.27 \times 10^{-10}$  | -5.195  | $1.32 \times 10^{-06}$ | -5.200  | $1.27 \times 10^{-06}$ |
| Frontal Medial Cortex-r               | -13.197 | $1.15 \times 10^{-06}$  | -10.520 | $2.72 \times 10^{-04}$ | -10.580 | $2.46 \times 10^{-04}$ |
| Frontal Operculum Cortex-l            | -12.124 | $5.33 \times 10^{-06}$  | -9.823  | $5.40 \times 10^{-04}$ | -9.832  | $5.22 \times 10^{-04}$ |
| Frontal Operculum Cortex-r            | -10.859 | $8.30 \times 10^{-06}$  | -9.211  | $4.27 \times 10^{-04}$ | -9.248  | $4.05 \times 10^{-04}$ |
| Frontal Orbital Cortex-l              | -14.997 | $2.54 \times 10^{-07}$  | -14.800 | $2.53 \times 10^{-06}$ | -14.770 | $2.48 \times 10^{-06}$ |
| Frontal Orbital Cortex-r              | -4.326  | $7.84 \times 10^{-06}$  | -3.594  | $5.42 \times 10^{-04}$ | -3.586  | $5.48 \times 10^{-04}$ |
| Frontal Pole-l                        | -4.332  | $9.78 \times 10^{-07}$  | -3.694  | $1.06 \times 10^{-04}$ | -3.665  | $1.16 \times 10^{-04}$ |
| Frontal Pole-r                        | -9.184  | $1.26 \times 10^{-04}$  | -6.938  | $6.30 \times 10^{-03}$ | -6.971  | $6.03 \times 10^{-03}$ |
| Heschl's Gyrus (includes H1 and H2)-l | -12.733 | $6.37 \times 10^{-08}$  | -10.400 | $4.41 \times 10^{-05}$ | -10.370 | $4.42 \times 10^{-05}$ |
| Heschl's Gyrus (includes H1 and H2)-r | -6.838  | $2.62 \times 10^{-04}$  | -5.665  | $4.35 \times 10^{-03}$ | -5.681  | $4.21 \times 10^{-03}$ |
| Hippocampus-l                         | -8.168  | $2.87 \times 10^{-04}$  | -7.366  | $2.16 \times 10^{-03}$ | -7.404  | $2.06 \times 10^{-03}$ |
| Hippocampus-r                         | -27.740 | $4.62 \times 10^{-09}$  | -23.580 | $2.53 \times 10^{-06}$ | -23.780 | $2.14 \times 10^{-06}$ |
| I-IV Cerebellum-l                     | -22.320 | $9.78 \times 10^{-07}$  | -19.270 | $6.68 \times 10^{-05}$ | -19.420 | $5.62 \times 10^{-05}$ |

| I-IV Cerebellum-r                                | -13.310                   | $7.67 \times 10^{-06}$ | -12.870                   | $5.96 \times 10^{-05}$ | -12.920                   | $5.53 \times 10^{-05}$ |
|--------------------------------------------------|---------------------------|------------------------|---------------------------|------------------------|---------------------------|------------------------|
|                                                  | <b>Model1</b>             |                        | <b>Model2</b>             |                        | <b>Model3</b>             |                        |
|                                                  | <b><math>\beta</math></b> | <b>FDR</b>             | <b><math>\beta</math></b> | <b>FDR</b>             | <b><math>\beta</math></b> | <b>FDR</b>             |
| IX Cerebellum-l                                  | -12.156                   | $2.01 \times 10^{-05}$ | -10.200                   | $8.43 \times 10^{-04}$ | -10.200                   | $8.32 \times 10^{-04}$ |
| IX Cerebellum-r                                  | -4.202                    | $4.01 \times 10^{-02}$ | -3.087                    | $1.58 \times 10^{-01}$ | -3.098                    | $1.55 \times 10^{-01}$ |
| IX Cerebellum-v                                  | -7.066                    | $3.09 \times 10^{-04}$ | -6.542                    | $1.83 \times 10^{-03}$ | -6.586                    | $1.69 \times 10^{-03}$ |
| Inferior Frontal Gyrus, pars opercularis-l       | -9.477                    | $4.30 \times 10^{-04}$ | -6.927                    | $1.49 \times 10^{-02}$ | -6.877                    | $1.56 \times 10^{-02}$ |
| Inferior Frontal Gyrus, pars opercularis-r       | -13.715                   | $2.10 \times 10^{-05}$ | -11.860                   | $6.07 \times 10^{-04}$ | -11.890                   | $5.77 \times 10^{-04}$ |
| Inferior Frontal Gyrus, pars triangularis-l      | -6.805                    | $6.36 \times 10^{-03}$ | -5.391                    | $4.16 \times 10^{-02}$ | -5.340                    | $4.36 \times 10^{-02}$ |
| Inferior Frontal Gyrus, pars triangularis-r      | -11.950                   | $5.50 \times 10^{-04}$ | -9.685                    | $8.43 \times 10^{-03}$ | -9.735                    | $7.99 \times 10^{-03}$ |
| Inferior Temporal Gyrus, anterior division-l     | -40.304                   | $1.80 \times 10^{-08}$ | -33.840                   | $6.56 \times 10^{-06}$ | -33.940                   | $5.95 \times 10^{-06}$ |
| Inferior Temporal Gyrus, anterior division-r     | -31.244                   | $1.05 \times 10^{-05}$ | -24.180                   | $1.15 \times 10^{-03}$ | -24.200                   | $1.13 \times 10^{-03}$ |
| Inferior Temporal Gyrus, posterior division-l    | -24.454                   | $7.93 \times 10^{-11}$ | -22.180                   | $3.41 \times 10^{-08}$ | -22.190                   | $2.85 \times 10^{-08}$ |
| Inferior Temporal Gyrus, posterior division-r    | -23.893                   | $4.62 \times 10^{-09}$ | -21.000                   | $1.45 \times 10^{-06}$ | -21.000                   | $1.45 \times 10^{-06}$ |
| Inferior Temporal Gyrus, temporooccipital part-l | -7.447                    | $1.17 \times 10^{-04}$ | -6.572                    | $1.32 \times 10^{-03}$ | -6.528                    | $1.40 \times 10^{-03}$ |
| Inferior Temporal Gyrus, temporooccipital part-r | -7.603                    | $4.30 \times 10^{-05}$ | -6.284                    | $1.44 \times 10^{-03}$ | -6.250                    | $1.48 \times 10^{-03}$ |
| Insular Cortex-l                                 | -6.639                    | $6.32 \times 10^{-11}$ | -5.980                    | $3.56 \times 10^{-08}$ | -6.032                    | $2.53 \times 10^{-08}$ |
| Insular Cortex-r                                 | -6.494                    | $3.47 \times 10^{-10}$ | -5.772                    | $2.08 \times 10^{-07}$ | -5.830                    | $1.48 \times 10^{-07}$ |
| Intracalcarine Cortex-l                          | -7.520                    | $2.18 \times 10^{-05}$ | -5.392                    | $4.07 \times 10^{-03}$ | -5.380                    | $4.07 \times 10^{-03}$ |
| Intracalcarine Cortex-r                          | -4.282                    | $1.38 \times 10^{-02}$ | -2.421                    | $1.87 \times 10^{-01}$ | -2.416                    | $1.88 \times 10^{-01}$ |
| Juxtapositional Lobule Cortex-l                  | -9.828                    | $1.35 \times 10^{-14}$ | -8.060                    | $4.22 \times 10^{-09}$ | -8.081                    | $3.66 \times 10^{-09}$ |
| Juxtapositional Lobule Cortex-r                  | -8.287                    | $2.33 \times 10^{-13}$ | -6.434                    | $1.28 \times 10^{-07}$ | -6.435                    | $1.25 \times 10^{-07}$ |
| Lateral Occipital Cortex, inferior division-l    | -14.260                   | $3.78 \times 10^{-08}$ | -11.980                   | $1.28 \times 10^{-05}$ | -12.040                   | $1.12 \times 10^{-05}$ |
| Lateral Occipital Cortex, inferior division-r    | -11.312                   | $8.73 \times 10^{-06}$ | -8.426                    | $1.51 \times 10^{-03}$ | -8.506                    | $1.37 \times 10^{-03}$ |
| Lateral Occipital Cortex, superior division-l    | -7.628                    | $2.19 \times 10^{-02}$ | -4.140                    | $2.39 \times 10^{-01}$ | -4.063                    | $2.50 \times 10^{-01}$ |
| Lateral Occipital Cortex, superior division-r    | -10.937                   | $2.83 \times 10^{-03}$ | -7.573                    | $5.22 \times 10^{-02}$ | -7.366                    | $5.84 \times 10^{-02}$ |
| Lingual Gyrus-l                                  | -10.422                   | $4.17 \times 10^{-06}$ | -8.013                    | $8.43 \times 10^{-04}$ | -8.030                    | $8.29 \times 10^{-04}$ |
| Lingual Gyrus-r                                  | -11.525                   | $9.91 \times 10^{-07}$ | -9.352                    | $1.95 \times 10^{-04}$ | -9.397                    | $1.80 \times 10^{-04}$ |

| Middle Frontal Gyrus-l                         | -19.805                   |                        | $3.17 \times 10^{-06}$    |                        | -16.960                   |                        |
|------------------------------------------------|---------------------------|------------------------|---------------------------|------------------------|---------------------------|------------------------|
|                                                | <b>Model1</b>             |                        | <b>Model2</b>             |                        | <b>Model3</b>             |                        |
|                                                | <b><math>\beta</math></b> | <b>FDR</b>             | <b><math>\beta</math></b> | <b>FDR</b>             | <b><math>\beta</math></b> | <b>FDR</b>             |
| Middle Frontal Gyrus-r                         | -19.140                   | $1.92 \times 10^{-05}$ | -16.060                   | $6.20 \times 10^{-04}$ | -15.970                   | $6.57 \times 10^{-04}$ |
| Middle Temporal Gyrus, anterior division-l     | -5.743                    | $5.76 \times 10^{-06}$ | -4.567                    | $6.65 \times 10^{-04}$ | -4.565                    | $6.78 \times 10^{-04}$ |
| Middle Temporal Gyrus, anterior division-r     | -7.658                    | $2.17 \times 10^{-07}$ | -6.093                    | $9.90 \times 10^{-05}$ | -6.110                    | $9.42 \times 10^{-05}$ |
| Middle Temporal Gyrus, posterior division-l    | -18.644                   | $7.65 \times 10^{-14}$ | -16.720                   | $3.28 \times 10^{-10}$ | -16.850                   | $2.20 \times 10^{-10}$ |
| Middle Temporal Gyrus, posterior division-r    | -16.918                   | $5.45 \times 10^{-14}$ | -14.860                   | $4.75 \times 10^{-10}$ | -14.940                   | $3.48 \times 10^{-10}$ |
| Middle Temporal Gyrus, temporooccipital part-l | -6.108                    | $2.21 \times 10^{-06}$ | -4.984                    | $2.99 \times 10^{-04}$ | -5.033                    | $2.53 \times 10^{-04}$ |
| Middle Temporal Gyrus, temporooccipital part-r | -6.093                    | $8.73 \times 10^{-06}$ | -4.883                    | $8.50 \times 10^{-04}$ | -4.886                    | $8.32 \times 10^{-04}$ |
| Occipital Fusiform Gyrus-l                     | -2.413                    | $3.09 \times 10^{-04}$ | -1.900                    | $7.14 \times 10^{-03}$ | -1.905                    | $6.81 \times 10^{-03}$ |
| Occipital Fusiform Gyrus-r                     | -1.963                    | $4.01 \times 10^{-04}$ | -1.482                    | $1.15 \times 10^{-02}$ | -1.485                    | $1.13 \times 10^{-02}$ |
| Occipital Pole-l                               | -9.611                    | $1.75 \times 10^{-04}$ | -6.351                    | $1.84 \times 10^{-02}$ | -6.418                    | $1.71 \times 10^{-02}$ |
| Occipital Pole-r                               | -15.520                   | $1.18 \times 10^{-08}$ | -10.910                   | $1.45 \times 10^{-04}$ | -10.880                   | $1.50 \times 10^{-04}$ |
| Pallidum-l                                     | -4.341                    | $2.21 \times 10^{-08}$ | -3.210                    | $1.06 \times 10^{-04}$ | -3.232                    | $9.46 \times 10^{-05}$ |
| Pallidum-r                                     | -4.597                    | $7.93 \times 10^{-11}$ | -3.549                    | $2.93 \times 10^{-06}$ | -3.539                    | $3.05 \times 10^{-06}$ |
| Paracingulate Gyrus-l                          | -6.321                    | $1.69 \times 10^{-04}$ | -4.378                    | $1.27 \times 10^{-02}$ | -4.397                    | $1.22 \times 10^{-02}$ |
| Paracingulate Gyrus-r                          | -7.005                    | $9.78 \times 10^{-07}$ | -4.723                    | $1.68 \times 10^{-03}$ | -4.772                    | $1.48 \times 10^{-03}$ |
| Parahippocampal Gyrus, anterior division-l     | -5.062                    | $5.25 \times 10^{-04}$ | -3.611                    | $1.91 \times 10^{-02}$ | -3.653                    | $1.77 \times 10^{-02}$ |
| Parahippocampal Gyrus, anterior division-r     | -7.583                    | $2.43 \times 10^{-05}$ | -5.042                    | $7.74 \times 10^{-03}$ | -5.122                    | $6.81 \times 10^{-03}$ |
| Parahippocampal Gyrus, posterior division-l    | -6.692                    | $3.09 \times 10^{-04}$ | -5.188                    | $7.14 \times 10^{-03}$ | -5.205                    | $6.81 \times 10^{-03}$ |
| Parahippocampal Gyrus, posterior division-r    | -7.569                    | $3.25 \times 10^{-05}$ | -5.251                    | $5.67 \times 10^{-03}$ | -5.287                    | $5.30 \times 10^{-03}$ |
| Parietal Operculum Cortex-l                    | -3.080                    | $9.01 \times 10^{-05}$ | -2.508                    | $2.40 \times 10^{-03}$ | -2.506                    | $2.40 \times 10^{-03}$ |
| Parietal Operculum Cortex-r                    | -4.777                    | $3.46 \times 10^{-10}$ | -4.043                    | $6.56 \times 10^{-07}$ | -4.058                    | $5.80 \times 10^{-07}$ |
| Planum Polare-l                                | -10.974                   | $4.12 \times 10^{-10}$ | -8.680                    | $2.75 \times 10^{-06}$ | -8.743                    | $2.27 \times 10^{-06}$ |
| Planum Polare-r                                | -8.976                    | $9.78 \times 10^{-07}$ | -7.935                    | $4.78 \times 10^{-05}$ | -7.947                    | $4.42 \times 10^{-05}$ |
| Planum Temporale-l                             | -4.110                    | $2.83 \times 10^{-03}$ | -3.704                    | $1.12 \times 10^{-02}$ | -3.753                    | $1.01 \times 10^{-02}$ |
| Planum Temporale-r                             | -4.729                    | $2.30 \times 10^{-04}$ | -3.974                    | $3.61 \times 10^{-03}$ | -4.012                    | $3.28 \times 10^{-03}$ |
| Postcentral Gyrus-l                            | -4.381                    | $5.71 \times 10^{-11}$ | -3.379                    | $2.35 \times 10^{-06}$ | -3.410                    | $1.89 \times 10^{-06}$ |
| Postcentral Gyrus-r                            | -4.459                    | $6.63 \times 10^{-11}$ | -3.726                    | $3.11 \times 10^{-07}$ | -3.752                    | $2.45 \times 10^{-07}$ |
| Precentral Gyrus-l                             | -2.850                    | $3.20 \times 10^{-04}$ | -2.003                    | $1.60 \times 10^{-02}$ | -2.037                    | $1.44 \times 10^{-02}$ |
| Precentral Gyrus-r                             | -3.487                    | $1.19 \times 10^{-08}$ | -2.731                    | $3.02 \times 10^{-05}$ | -2.735                    | $2.90 \times 10^{-05}$ |
| Precuneous Cortex-l                            | -5.464                    | $1.16 \times 10^{-04}$ | -4.903                    | $1.26 \times 10^{-03}$ | -4.938                    | $1.16 \times 10^{-03}$ |
| Precuneous Cortex-r                            | -6.470                    | $2.06 \times 10^{-11}$ | -4.906                    | $2.35 \times 10^{-06}$ | -4.936                    | $1.97 \times 10^{-06}$ |



|                                                | -1.548                    | $3.34 \times 10^{-05}$  | -1.350                    | $7.26 \times 10^{-04}$ | -1.336                    | $8.29 \times 10^{-04}$ |
|------------------------------------------------|---------------------------|-------------------------|---------------------------|------------------------|---------------------------|------------------------|
|                                                | <b>Model1</b>             |                         | <b>Model2</b>             |                        | <b>Model3</b>             |                        |
|                                                | <b><math>\beta</math></b> | <b>FDR</b>              | <b><math>\beta</math></b> | <b>FDR</b>             | <b><math>\beta</math></b> | <b>FDR</b>             |
| Putamen-l                                      | -2.167                    | $1.93 \times 10^{-05}$  | -1.647                    | $2.02 \times 10^{-03}$ | -1.637                    | $2.13 \times 10^{-03}$ |
| Subcallosal Cortex-l                           | -12.558                   | $2.79 \times 10^{-03}$  | -10.070                   | $2.06 \times 10^{-02}$ | -10.160                   | $1.93 \times 10^{-02}$ |
| Subcallosal Cortex-r                           | -13.899                   | $5.42 \times 10^{-04}$  | -13.170                   | $1.84 \times 10^{-03}$ | -13.220                   | $1.74 \times 10^{-03}$ |
| Superior Frontal Gyrus-l                       | -4.485                    | $1.04 \times 10^{-06}$  | -3.808                    | $1.15 \times 10^{-04}$ | -3.812                    | $1.16 \times 10^{-04}$ |
| Superior Frontal Gyrus-r                       | -4.797                    | $6.40 \times 10^{-07}$  | -3.910                    | $1.45 \times 10^{-04}$ | -3.886                    | $1.57 \times 10^{-04}$ |
| Superior Parietal Lobule-l                     | -4.662                    | $3.82 \times 10^{-02}$  | -4.553                    | $5.75 \times 10^{-02}$ | -4.546                    | $5.71 \times 10^{-02}$ |
| Superior Parietal Lobule-r                     | -4.413                    | $6.19 \times 10^{-02}$  | -3.520                    | $1.64 \times 10^{-01}$ | -3.477                    | $1.67 \times 10^{-01}$ |
| Superior Temporal Gyrus, anterior division-l   | -7.550                    | $4.93 \times 10^{-08}$  | -6.033                    | $5.34 \times 10^{-05}$ | -6.146                    | $3.86 \times 10^{-05}$ |
| Superior Temporal Gyrus, anterior division-r   | -8.477                    | $1.42 \times 10^{-08}$  | -6.234                    | $9.70 \times 10^{-05}$ | -6.337                    | $6.89 \times 10^{-05}$ |
| Superior Temporal Gyrus, posterior division-l  | 0.015                     | $9.07 \times 10^{-01}$  | 0.005                     | $9.70 \times 10^{-01}$ | 0.002                     | $9.89 \times 10^{-01}$ |
| Superior Temporal Gyrus, posterior division-r  | -0.157                    | $2.77 \times 10^{-01}$  | -0.159                    | $2.90 \times 10^{-01}$ | -0.163                    | $2.81 \times 10^{-01}$ |
| Supracalcarine Cortex-l                        | -9.032                    | $2.15 \times 10^{-12}$  | -7.089                    | $2.41 \times 10^{-07}$ | -7.115                    | $2.09 \times 10^{-07}$ |
| Supracalcarine Cortex-r                        | -8.248                    | $3.88 \times 10^{-10}$  | -6.480                    | $4.23 \times 10^{-06}$ | -6.487                    | $4.05 \times 10^{-06}$ |
| Supramarginal Gyrus, anterior division-l       | -5.898                    | $<3.97 \times 10^{-15}$ | -4.474                    | $5.82 \times 10^{-09}$ | -4.485                    | $4.95 \times 10^{-09}$ |
| Supramarginal Gyrus, anterior division-r       | -6.991                    | $<3.97 \times 10^{-15}$ | -5.303                    | $4.66 \times 10^{-10}$ | -5.318                    | $3.48 \times 10^{-10}$ |
| Supramarginal Gyrus, posterior division-l      | -2.354                    | $1.94 \times 10^{-11}$  | -2.050                    | $3.62 \times 10^{-08}$ | -2.080                    | $2.34 \times 10^{-08}$ |
| Supramarginal Gyrus, posterior division-r      | -2.669                    | $3.78 \times 10^{-14}$  | -2.104                    | $2.22 \times 10^{-08}$ | -2.132                    | $1.28 \times 10^{-08}$ |
| Temporal Fusiform Cortex, anterior division-l  | -1.675                    | $5.17 \times 10^{-01}$  | -3.499                    | $1.68 \times 10^{-01}$ | -3.712                    | $1.45 \times 10^{-01}$ |
| Temporal Fusiform Cortex, anterior division-r  | -2.772                    | $1.57 \times 10^{-03}$  | -2.333                    | $1.22 \times 10^{-02}$ | -2.348                    | $1.17 \times 10^{-02}$ |
| Temporal Fusiform Cortex, posterior division-l | -2.469                    | $9.10 \times 10^{-03}$  | -2.127                    | $3.41 \times 10^{-02}$ | -2.145                    | $3.24 \times 10^{-02}$ |
| Temporal Fusiform Cortex, posterior division-r | -5.700                    | $1.42 \times 10^{-06}$  | -4.296                    | $6.59 \times 10^{-04}$ | -4.342                    | $5.77 \times 10^{-04}$ |
| Temporal Occipital Fusiform Cortex-l           | -5.857                    | $5.64 \times 10^{-07}$  | -4.306                    | $5.58 \times 10^{-04}$ | -4.346                    | $4.95 \times 10^{-04}$ |
| Temporal Occipital Fusiform Cortex-r           | -18.325                   | $1.70 \times 10^{-08}$  | -13.030                   | $1.45 \times 10^{-04}$ | -13.170                   | $1.22 \times 10^{-04}$ |
| Temporal Pole-l                                | -3.267                    | $1.17 \times 10^{-05}$  | -2.491                    | $1.68 \times 10^{-03}$ | -2.508                    | $1.54 \times 10^{-03}$ |
| Temporal Pole-r                                | -16.151                   | $3.01 \times 10^{-07}$  | -10.440                   | $1.59 \times 10^{-03}$ | -10.550                   | $1.40 \times 10^{-03}$ |
| Thalamus-l                                     | -19.471                   | $5.27 \times 10^{-05}$  | -14.680                   | $3.43 \times 10^{-03}$ | -14.890                   | $2.93 \times 10^{-03}$ |
| Thalamus-r                                     | -0.002                    | $6.87 \times 10^{-01}$  | -0.006                    | $2.78 \times 10^{-01}$ | -0.006                    | $2.83 \times 10^{-01}$ |

| V Cerebellum-l     | -23.121                   | $1.12 \times 10^{-05}$ | -17.970                   | $1.12 \times 10^{-03}$ | -18.260                   | $9.10 \times 10^{-04}$ |
|--------------------|---------------------------|------------------------|---------------------------|------------------------|---------------------------|------------------------|
|                    | <b>Model1</b>             |                        | <b>Model2</b>             |                        | <b>Model3</b>             |                        |
|                    | <b><math>\beta</math></b> | <b>FDR</b>             | <b><math>\beta</math></b> | <b>FDR</b>             | <b><math>\beta</math></b> | <b>FDR</b>             |
| V Cerebellum-r     | -19.977                   | $9.22 \times 10^{-08}$ | -12.850                   | $1.07 \times 10^{-03}$ | -12.890                   | $1.00 \times 10^{-03}$ |
| VI Cerebellum-l    | -0.926                    | $1.47 \times 10^{-04}$ | -0.779                    | $2.62 \times 10^{-03}$ | -0.781                    | $2.53 \times 10^{-03}$ |
| VI Cerebellum-r    | -22.203                   | $1.17 \times 10^{-09}$ | -16.550                   | $2.13 \times 10^{-05}$ | -16.590                   | $1.96 \times 10^{-05}$ |
| VI Cerebellum-v    | -11.295                   | $4.70 \times 10^{-08}$ | -6.756                    | $1.68 \times 10^{-03}$ | -6.777                    | $1.58 \times 10^{-03}$ |
| VIIIa Cerebellum-l | -0.320                    | $2.45 \times 10^{-04}$ | -0.239                    | $9.65 \times 10^{-03}$ | -0.244                    | $7.99 \times 10^{-03}$ |
| VIIIa Cerebellum-r | -13.651                   | $5.94 \times 10^{-10}$ | -9.057                    | $1.06 \times 10^{-04}$ | -9.082                    | $9.52 \times 10^{-05}$ |
| VIIIa Cerebellum-v | -9.721                    | $4.94 \times 10^{-06}$ | -5.491                    | $1.22 \times 10^{-02}$ | -5.506                    | $1.17 \times 10^{-02}$ |
| VIIIb Cerebellum-l | -2.322                    | $9.87 \times 10^{-06}$ | -1.466                    | $7.73 \times 10^{-03}$ | -1.488                    | $6.81 \times 10^{-03}$ |
| VIIIb Cerebellum-r | -9.446                    | $2.63 \times 10^{-05}$ | -4.225                    | $6.85 \times 10^{-02}$ | -4.245                    | $6.62 \times 10^{-02}$ |
| VIIIb Cerebellum-v | -4.587                    | $3.49 \times 10^{-03}$ | -2.093                    | $2.03 \times 10^{-01}$ | -2.117                    | $1.97 \times 10^{-01}$ |
| VIIb Cerebellum-l  | -0.901                    | $7.69 \times 10^{-04}$ | -0.482                    | $8.60 \times 10^{-02}$ | -0.494                    | $7.80 \times 10^{-02}$ |
| VIIb Cerebellum-r  | 0.559                     | $7.41 \times 10^{-01}$ | 3.321                     | $5.80 \times 10^{-02}$ | 3.342                     | $5.68 \times 10^{-02}$ |
| VIIb Cerebellum-v  | -2.871                    | $1.88 \times 10^{-02}$ | -1.155                    | $3.62 \times 10^{-01}$ | -1.207                    | $3.40 \times 10^{-01}$ |
| Ventral Striatum-l | -1.317                    | $5.26 \times 10^{-06}$ | -0.867                    | $4.35 \times 10^{-03}$ | -0.880                    | $3.85 \times 10^{-03}$ |
| Ventral Striatum-r | -2.840                    | $3.43 \times 10^{-02}$ | -0.877                    | $5.27 \times 10^{-01}$ | -0.935                    | $5.00 \times 10^{-01}$ |
| X Cerebellum-l     | -0.734                    | $2.66 \times 10^{-03}$ | -0.736                    | $4.35 \times 10^{-03}$ | -0.742                    | $4.06 \times 10^{-03}$ |
| X Cerebellum-v     | 0.092                     | $5.01 \times 10^{-01}$ | 0.164                     | $2.39 \times 10^{-01}$ | 0.159                     | $2.54 \times 10^{-01}$ |
| X Cerebellum-r     | -1.063                    | $1.58 \times 10^{-05}$ | -0.997                    | $1.45 \times 10^{-04}$ | -1.006                    | $1.34 \times 10^{-04}$ |

- l: left

- r: right

- v: vermis

PFDR: P-value after FDR correction

Model 1: adjusted age, sex;

Model 2: adjusted age, sex, sleep duration, skin colour, use of sun/UV protection, fracture history, smoking status, alcohol drinker status, BMI, physical activity, PM2.5, TDI, years of education, employment status, vitamin D supplement, assessment center;

Model 3: adjusted age, sex, sleep duration, skin colour, use of sun/UV protection, fracture history, smoking status, alcohol drinker status, BMI, physical activity, PM2.5, TDI, years of education, employment status, vitamin D supplement, assessment center, history of hypertension, stroke, coronary heart disease and diabetes.

**Table 3. Association between sunlight exposure time and cognitive function tests**

|                                | Total No. | Model1  |                         | Model2  |                         | Model3  |                         |
|--------------------------------|-----------|---------|-------------------------|---------|-------------------------|---------|-------------------------|
|                                |           | $\beta$ | PFDR                    | $\beta$ | PFDR                    | $\beta$ | PFDR                    |
| Numeric memory                 | 26,194    | -0.014  | $<2.40 \times 10^{-16}$ | -0.011  | $2.70 \times 10^{-11}$  | -0.011  | $3.30 \times 10^{-11}$  |
| Pairs matching                 | 38,178    | 0.008   | $4.82 \times 10^{-05}$  | 0.005   | $9.84 \times 10^{-03}$  | 0.005   | $8.98 \times 10^{-03}$  |
| Prospective memory             | 33,582    | -0.139  | $<2.40 \times 10^{-16}$ | -0.112  | $6.17 \times 10^{-15}$  | -0.112  | $6.48 \times 10^{-15}$  |
| Reaction time                  | 37,967    | 0.002   | $5.60 \times 10^{-07}$  | 0.002   | $7.29 \times 10^{-03}$  | 0.002   | $7.58 \times 10^{-03}$  |
| Fluid intelligence / reasoning | 37,601    | -0.041  | $<2.40 \times 10^{-16}$ | -0.031  | $<3.43 \times 10^{-16}$ | -0.031  | $<3.43 \times 10^{-16}$ |
| Matrix pattern completion      | 29,679    | -0.027  | $<2.40 \times 10^{-16}$ | -0.019  | $<3.43 \times 10^{-16}$ | -0.019  | $<3.43 \times 10^{-16}$ |
| Symbol digit substitution      | 29,684    | -0.018  | $<2.40 \times 10^{-16}$ | -0.013  | $<3.43 \times 10^{-16}$ | -0.013  | $<3.43 \times 10^{-16}$ |
| Tower rearranging              | 25,471    | -0.019  | $<2.40 \times 10^{-16}$ | -0.015  | $<3.43 \times 10^{-16}$ | -0.015  | $<3.43 \times 10^{-16}$ |
| Trail making 1                 | 29,659    | 0.012   | $<2.40 \times 10^{-16}$ | 0.008   | $4.09 \times 10^{-14}$  | 0.008   | $4.71 \times 10^{-14}$  |
| Trail making 2                 | 28,923    | 0.028   | $<2.40 \times 10^{-16}$ | 0.020   | $<3.43 \times 10^{-16}$ | 0.020   | $<3.43 \times 10^{-16}$ |
| Picture vocabulary             | 29,640    | -0.287  | $<2.40 \times 10^{-16}$ | -0.205  | $<3.43 \times 10^{-16}$ | -0.205  | $<3.43 \times 10^{-16}$ |
| Paired associate learning      | 29,957    | -0.032  | $<2.40 \times 10^{-16}$ | -0.025  | $<3.43 \times 10^{-16}$ | -0.025  | $<3.43 \times 10^{-16}$ |

Model 1: adjusted age, sex;

Model 2: adjusted age, sex, sleep duration, skin colour, use of sun/UV protection, fracture history, smoking status, alcohol drinker status, BMI, physical activity, PM2.5, TDI, years of education, employment status, vitamin D supplement, assessment center;

Model 3: adjusted age, sex, sleep duration, skin colour, use of sun/UV protection, fracture history, smoking status, alcohol drinker status, BMI, physical activity, PM2.5, TDI, years of education, employment status, vitamin D supplement, assessment center, history of hypertension, stroke, coronary heart disease and diabetes.



**Table 4. Results of the mediation analyses between sunlight exposure time, cognitive function tests, and mean white matter volume**

|                                | Total.No | Total effect |               |                |                         | Prop. Mediated |               |                |                         |
|--------------------------------|----------|--------------|---------------|----------------|-------------------------|----------------|---------------|----------------|-------------------------|
|                                |          | $\beta$      | 95%CI<br>-low | 95%CI<br>-high | PFDR                    | $\beta$        | 95%CI<br>-low | 95%CI-<br>high | PFDR                    |
| Numeric memory                 | 19,566   | -0.157       | -0.187        | -0.130         | $<2.40 \times 10^{-16}$ | 2.26%          | 0.010         | 0.010          | $8.00 \times 10^{-04}$  |
| Pairs matching                 | 20,004   | -0.074       | -0.099        | -0.050         | $<2.40 \times 10^{-16}$ | 2.69%          | 0.011         | 0.050          | $<1.20 \times 10^{-15}$ |
| Prospective memory             | 27,122   | 0.013        | -0.001        | 0.030          | $9.20 \times 10^{-01}$  | NA             | NA            | NA             | NA                      |
| Reaction time                  | 24009    | -0.004       | -0.005        | 0.000          | $<2.40 \times 10^{-16}$ | 1.99%          | 0.008         | 0.040          | $8.00 \times 10^{-04}$  |
| Fluid intelligence / reasoning | 26,951   | 0.713        | -0.083        | 1.530          | $8.73 \times 10^{-03}$  | 21.44%         | -0.797        | 1.740          | $8.04 \times 10^{-02}$  |
| Matrix pattern completion      | 26,650   | -0.214       | -0.238        | -0.190         | $<2.40 \times 10^{-16}$ | 1.89%          | 0.009         | 0.030          | $8.00 \times 10^{-04}$  |
| Symbol digit substitution      | 19,575   | -0.224       | -0.269        | -0.180         | $<2.40 \times 10^{-16}$ | 3.24%          | 0.015         | 0.050          | $1.44 \times 10^{-03}$  |
| Tower rearranging              | 19,405   | -0.168       | -0.201        | -0.130         | $<2.40 \times 10^{-16}$ | 1.85%          | 0.008         | 0.030          | $1.07 \times 10^{-03}$  |
| Trail making 1                 | 19,556   | 2.656        | 1.868         | 3.430          | $<2.40 \times 10^{-16}$ | 2.77%          | 0.012         | 0.050          | $1.07 \times 10^{-03}$  |
| Trail making 2                 | 19,096   | 12.732       | 10.430        | 15.080         | $<2.40 \times 10^{-16}$ | 2.04%          | 0.009         | 0.030          | $1.07 \times 10^{-03}$  |
| Picture vocabulary             | 19,537   | -0.204       | -0.223        | -0.190         | $<2.40 \times 10^{-16}$ | 1.93%          | 0.009         | 0.030          | $8.00 \times 10^{-04}$  |
| Paired associate learning      | 19,775   | -0.160       | -0.188        | -0.130         | $<2.40 \times 10^{-16}$ | 1.07%          | 0.004         | 0.020          | $<1.20 \times 10^{-15}$ |

PFDR: P-value after FDR correction

CI:Confidence interval

Adjusted age, sex, sleep duration, skin colour, use of sun/UV protection, fracture history, smoking status, alcohol drinker status, BMI, physical activity, PM2.5, TDI, years of education, employment status, vitamin D supplement, assessment center, history of hypertension, stroke, coronary heart disease and diabetes.

**Table 5. Results of the mediation analyses between sunlight exposure time, cognitive function tests, and mean gray matter volume**

|                                | Total.No | Total effect |               |                |                         | Prop. Mediated |               |                |                         |
|--------------------------------|----------|--------------|---------------|----------------|-------------------------|----------------|---------------|----------------|-------------------------|
|                                |          | $\beta$      | 95%CI<br>-low | 95%CI<br>-high | PFDR                    | $\beta$        | 95%CI<br>-low | 95%CI<br>-high | PFDR                    |
| Pairs matching                 | 20,004   | -0.054       | -0.076        | -0.030         | $<2.40 \times 10^{-16}$ | 5.87%          | 0.032         | 0.110          | $<2.40 \times 10^{-16}$ |
| Prospective memory             | 27,122   | -0.001       | -0.014        | 0.010          | $9.20 \times 10^{-01}$  | NA             | NA            | NA             | NA                      |
| Reaction time                  | 24,009   | -0.003       | -0.004        | 0.000          | $<2.40 \times 10^{-16}$ | 3.36%          | 0.015         | 0.060          | $<2.40 \times 10^{-16}$ |
| Fluid intelligence / reasoning | 26,951   | 0.001        | 0.000         | 0.000          | $8.73 \times 10^{-03}$  | 10.96%         | 0.051         | 0.380          | $8.73 \times 10^{-03}$  |
| Matrix pattern completion      | 26,650   | -0.166       | -0.187        | -0.140         | $<2.40 \times 10^{-16}$ | 4.14%          | 0.029         | 0.060          | $<2.40 \times 10^{-16}$ |
| Symbol digit substitution      | 19,575   | -0.129       | -0.167        | -0.090         | $<2.40 \times 10^{-16}$ | 6.64%          | 0.041         | 0.100          | $<2.40 \times 10^{-16}$ |
| Tower rearranging              | 19,405   | -0.105       | -0.134        | -0.080         | $<2.40 \times 10^{-16}$ | 5.18%          | 0.031         | 0.080          | $<2.40 \times 10^{-16}$ |
| Trail making 1                 | 19,556   | 0.005        | 0.003         | 0.010          | $<2.40 \times 10^{-16}$ | 11.61%         | 0.068         | 0.210          | $<2.40 \times 10^{-16}$ |
| Trail making 2                 | 19,096   | 0.013        | 0.010         | 0.020          | $<2.40 \times 10^{-16}$ | 6.67%          | 0.042         | 0.100          | $<2.40 \times 10^{-16}$ |
| Picture vocabulary             | 19,537   | -0.176       | -0.193        | -0.160         | $<2.40 \times 10^{-16}$ | 3.23%          | 0.021         | 0.050          | $<2.40 \times 10^{-16}$ |
| Paired associate learning      | 19,775   | -0.128       | -0.152        | -0.100         | $<2.40 \times 10^{-16}$ | 1.76%          | 0.009         | 0.030          | $<2.40 \times 10^{-16}$ |

PFDR: P-value after FDR correction

CI:Confidence interval

Adjusted age, sex, sleep duration, skin colour, use of sun/UV protection, fracture history, smoking status, alcohol drinker status, BMI, physical activity, PM2.5, TDI, years of education, employment status, vitamin D supplement, assessment center, history of hypertension, stroke, coronary heart disease and diabetes.
